# Supplementary material for: Harnessing Chemical Space Neural Networks to Systematically Annotate GPCR ligands
Source: Research Square preprint supplement (doi:10.21203/rs.3.rs-4287546/v1), 2024-06-13
Supplement: Supplementary file 1 [file 3f614fcd406b24df871e66f1.xlsx]

## Sheet: Dose response values
		All experimental values reported as relative luminescence units RLU, entire sheet can be copied to Graphpad prism for analysis
	[M]	5HT1A:Serotonin [M]			5HT4b:Serotonin [M]			MTNR1A:Melatonin [M]			OPRM1:DAMGO [M]			CHRM3:Acetylcholine [M]			ADRA2A:Epinephrine [M]			ADRA2B:Epinephrine [M]			ScS237 + Epinephrine			ScS237 + Acetylcholine chloride			ScS237 + Serotonin			ScS237 + Melatonin			ScS237 + DAMGO-enkephallin			ScFH236 + Epinephrine
	0.002	787	785	777.5	7181	7891	7334.5				15780	16140	14895																635	610.667	507	418	329	355.667	499.667	520	496
	0.001	985.5	1042.5	995.5	9559.5	8650	7915				13481.5	12212.5	12394
	0.0002	1272	1307	1238	8142.5	7523	6903				10164	8081.5	8751.5
	0.0001	1401.5	1197.5	1296	6906	6992.5	6726				7799.5	7182.5	7117
	1e-05	654	654.5	681.5	5169.5	5504.5	5045				3710	3482.5	3336																514.667	431	435.667	625	456.333	478.667	488	487.333	455
	1e-06	140.5	166	181.5	3985.5	4269.5	3986				932	900.5	833
	1e-07	124.5	115	106	2924	2759	2784.5				164.5	151.5	170
	1e-08	120	113.5	94	1925.5	2145.5	1895.5				83.5	86.5	104.5
	1e-09	113.5	107.5	107.5	1144	1123.5	1072				98.5	90	102.5
	1e-10	104.5	106.5	93	534	470.5	438.5				93.5	114	85.5
	1e-11	108	110.5	101	400	356	354
	1e-12
	1e-13
	1e-14
	0	106	129.5	119	281.5	303.5	277.5				98.5	89.5	87																558.333	490.667	492	631	556.333	655.667	527.333	700	583.333
	0.01													10162	10123.5	9240.5	119000	115946	105794	37084	38105.5	38001	577	489.333	484	990.667	872.333	897.333										470.333	468.667	413.667
	0.001													6208.5	6584	6744.5	123560	106490	119168	37237	44131	41662.5
	0.0001													4641	4706	5382	95232	101764	122469	39971.5	38606.5	41056.5
	1e-05													3442.5	4324	3849	107390	99305.5	108722	48813.5	45957.5	47583	484	487.333	485.667	644	446	467.333										556	448.333	393.667
	1e-06													3186.5	3433	3273	22861	23625.5	27117.5	31030	30365	32475
	1e-07													2815	3160	3164.5	1033	1038	1135	8308.5	8033	8757.5
	1e-08													1802	2043.5	1941	598.5	546	691	7657	7284.5	7937
	1e-09													516	505	604	451	551	552	8201.5	6779.5	7303.5
	1e-10													273	391	421	535	577	528	7871.5	7057	7298.5
	1e-11													369	393.5	371	399	482	574.5	9366.5	8691.5	8725.5
	0													348.5	420.5	400.5	422	354.5	478.5	9199	9179	9016	532	535	516.667	617.667	484.333	511.333										525.333	432.667	474
	0.002							42702.5	37388	35272.5
	0.001							49755	44720.5	49990
	0.0002							48083.5	50248.5	50129
	0.0001							36679.5	39024	48156.5
	1e-05							33686	33428	36180
	1e-06							31453	29452.5	31429
	1e-07							28022.5	26822.5	27660
	1e-08							21620	22392.5	22232
	1e-09							16110	15792.5	15276.5
	1e-10							9703	9905.5	9895.5
	1e-11							5746	5404	6168
	1e-12							5321.5	4605	5377.5
	1e-13							5050	4792.5	5442
	0							4846	5316	5264

## Sheet: fitted dose-response
Curves fitted in Graphpad Prism
	MTNR1A:Melatonin [M]	ADRA2B:Epinephrine [M]	ADRA2A:Epinephrine [M]	5HT4b:Serotonin [M]
[Agonist] vs. response -- Variable slope (four parameters)
Best-fit values
Bottom	4007	7858	536.8	61.73
Hillslope	0.3318	2.224	1.748	0.286
Top	Unstable	Unstable	Unstable	Unstable
EC50	2.48886e-08	6.85488e-07	2.10378e-06	1.60325e-06
logEC50	-7.604	-6.164	-5.677	-5.795
Span	Unstable	Unstable	Unstable	Unstable
95% CI (profile likelihood)
Bottom	3043 to 4806	7505 to 8404	511,7 to 583,8	-174,9 to 180,1
Hillslope	0,2540 to 0,4056	1,656 to +infinity	1,621 to 1,894	0,2160 to 0,3365
Top	(Very wide)	(Very wide)	(Very wide)	(Very wide)
EC50	1,096e-008 to 1,072e-007	5,232e-007 to ???	1,819e-006 to 2,427e-006	5,295e-007 to 1,928e-005
logEC50	-7,960 to -6,970	-6,281 to ???	-5,740 to -5,615	-6,276 to -4,715
Goodness of Fit
Degrees of Freedom	35	26	26	29
R squared (weighted)	0.9709	9.759	9.819	9.825
Weighted Sum of Squares (1/Y²)	0.5173	2.261	2.855	3.581
Sy.x	0.1216	9.325	1.048	1.111
Constraints
Bottom	Bottom > 0	Bottom > 0	Bottom > 0	EC50 > 0
EC50	EC50 > 0	EC50 > 0	EC50 > 0
Number of points
# of X values	111	63	63	33
# Y values analyzed	39	30	30	33
	5HT1A:Serotonin [M]
Bell-shaped, X is concentration
Best-fit values
Plateau1	107.4
Dip	1483
Plateau2	Very wide
EC50_1	1.35e-05
nH1	-1.202
EC50_2	0.00265
nH2	-0.8891
95% CI (profile likelihood)
Plateau1	103,8 to 112,3
Dip	1272 to 2310
Plateau2	(Very wide)
EC50_1	9,837e-006 to 2,181e-005
nH1	-1,363 to -0,9772
EC50_2	-0,002983 to +infinity
nH2	??? to -0,4596
Goodness of Fit
Degrees of Freedom	26
R squared (weighted)	9.894
Weighted Sum of Squares (1/Y²)	1.264
Sy.x	6.974
Number of points
# of X values	33
# Y values analyzed	33
	CHRM3:Acetylcholine [M]
Biphasic, X is concentration
Best-fit values
Top	Unstable
Bottom	356.5
Frac	8.834
EC50_1	6.106
nH1	3.547
EC50_2	7.99E-08
nH2	1.352
95% CI (profile likelihood)
Top	(Very wide)
Bottom	??? to 399,6
Frac	0,7188 to ???
EC50_1	-0,7633 to ???
nH1	0,2169 to 0,6189
EC50_2	5,750e-009 to 1,106e-008
nH2	1,089 to 2,062
Goodness of Fit
Degrees of Freedom	23
R squared (weighted)	9.885
Weighted Sum of Squares (1/Y²)	1.939
Sy.x	9.181
Constraints
Bottom	Bottom > 0
Frac	0 < Frac < 1
Number of points
# of X values	63
# Y values analyzed	30
