# Supplementary material for: Harnessing Chemical Space Neural Networks to Systematically Annotate GPCR ligands
Source: Research Square preprint supplement (doi:10.21203/rs.3.rs-4287546/v1), 2024-06-13
Supplement: Supplementary file 2 [file 4aa62873a6e78f4b80b9b394.xlsx]

## Sheet: Sheet1
4000 assay points, corresponding to the assay performed in this study
Eurofins Pathhunter (b-arrestin)
Item	Price USD	Description
PathHunter® eXpress kits (4000 wells, 8 receptors)	45580	Complete kit
PathHunter® Anti-PL/PK Antibody 50µg	1247	Additional ingredient listed in the kits documentation
Total	46827
Price pr. well	11.7067
Eurofins Pathhunter (Internalisation)
Item	Price USD
PathHunter® eXpress kits (4000 wells, 8 receptors)	45580	Complete kit
Total	45580
Price pr. well	11.395
Eurofins hithunter cAMP
Item	Price USD
cAMP Hunter™ eXpress kits (4000 wells, 8 receptors	26920	Complete kit
Total	26920
Price pr. well	6.73
Eurofins Chemibrite (Ca2+ mobilisation assay)
Item	Price
Corning 3764BC	1422	Plates reccomended by eurofins
Eurofins DiscoverX Cell Line Starter Packs	700	cell line specific media recommended by eurofins
AssayComplete™ Puromycin	97	antibiotic recommended by eurofins
AssayComplete™ Hygromycin B	227	antibiotic recommended by eurofins
AAT Bioquest Cat No 21080 (Calcium stain)	110	recommended stain
ChemiScreen™ Chem-1 Parental Control Cell Line	2979	Parental cell line from eurofins to allow construction of the 8 receptor strains at lowest cost possible
Plasmids X8 (Twist bioscience)	1680	for transient receptor expression
Total	7215
Price pr. well	1.80375
Tango
Item	Price
Corning 3610, (thermoSci: 07-200-566)	701	Plates required for Tango
Thermo Scientific K1095 (200µg)	1610	Kit for analysing the reporter of this system	https://www.thermofisher.com/document-connect/document-connect.html?url=https://assets.thermofisher.com/TFS-Assets%2FLSG%2Fmanuals%2FTango_OPRD1_bla_U2OS_man.pdf
Tango™ GPCR Enabling Model	28200	Parental cell line from ThermoFischer to allow construction of the 8 receptor strains at lowest cost possible
Plasmids X8 (Twist bioscience)	1680	for transient receptor expression
ThermoScientific: 12648010	185	freezing recovery media
ThermoScientific: 16600082	50	General purpose media
ThermoScientific: A3382001	166	FBS for media
ThermoScientific: 15630080	150	HEPES
ThermoScientific: R25001	400	Zeocin
ThermoScientific: 10131027	850	Geneticin
ThermoScientific: 10687010	340	Hygromycin
Total	34332
Price pr. well	8.583
Cisbio HTRF cAMP
Item	Price
Perkin Elmer part 6007680	460	Plates
Cisbio: e.g. 62AM9PEB (1000tests) X5	4175	Kits for cAMP detection
Cell line, SigmaAldrich: 85051005-DNA-5UG	385	CHO-K1 cell line for GPCR expression
Plasmids X8 (Twist bioscience)	1680	for transient receptor expression
ThermoScientific: 12648010	185	freezing recovery media
ThermoScientific: 16600082	50	General purpose media
ThermoScientific: A3382001	166	FBS for media
ThermoScientific: 15630080	150	HEPES
ThermoScientific: R25001	400	Zeocin
SigmaAldrich 344270-10mg	213	Forskolin to assay certain receptors
Total	7864
Price pr. well	1.966
PerkinElmer: Alphascreen
Item	Price
Perkin Elmer part 6007680	460	Plates
Perkin elmer: 6760635M (1000 tests) X5	3500	Kits for cAMP detection
Cell line, SigmaAldrich: 85051005-DNA-5UG	385	CHO-K1 cell line for GPCR expression
Plasmids X8 (Twist bioscience)	1680	for transient receptor expression
ThermoScientific: 12648010	185	freezing recovery media
ThermoScientific: 16600082	50	General purpose media
ThermoScientific: A3382001	166	FBS for media
ThermoScientific: 15630080	150	HEPES
ThermoScientific: R25001	400	Zeocin
SigmaAldrich 344270-10mg	213	Forskolin to assay certain receptors
Total	7189
Price pr. well	1.79725
PerkinElmer: LANCE Ultra
Item	Price
Perkin Elmer part 6007680	460	Plates
LANCE Ultra cAMP Detection Kit TRF0262 (1000 tests) X5	4500	detection kit
cAMPZen Frozen Cell lines, CHO-K1 (e.g. ES-542-CF) X 9	7470	cell preps sufficient for 500 assays pr. vial
Invitrogen 14025092	44	Hanks buffer
Invitrogen 15630080	153	HEPES
SigmaAldrich 344270-10mg	213	Forskolin to assay certain receptors
Total	12840
Price pr. well	3.21
Cisbio: HTRF IP-One
Item	Price
Perkin Elmer part 6007680	460	Plates
Cisbio: e.g. 62IPAPEB (1000 tests) X5	5550	IP1 detection kit
ChemiScreen™ Chem-1 Parental Control Cell Line	2979	Cell line for GPCR expression
Plasmids X8 (Twist bioscience)	1680	Plasmids for transient expression
Eurofins DiscoverX Cell Line Starter Pack	700	cell line specific media
Total	11369
Price pr. well	2.84225
Cisbio: HTRF Tag-lite
Item	Price
Greiner Bio-One cat 784075 (Merck M3561)	643	Plates
fluorescent probe (average estimation) eg. L0030RED	1555	fluorescent probe (costs vary)
Tag-lite T8-SNAP (Zeocin) plasmid (backbone licence)	1870	plasmid backbone
Plasmids X8 (Twist bioscience)	1680	Plasmids
ChemiScreen™ Chem-1 Parental Control Cell Line	2979	Cell line for GPCR expression
Eurofins DiscoverX Cell Line Starter Packs	700	cell line specific media
Terbium labeling kit 62TBSPEA	1760	Required kit for labelling
Invitrogen R25005	410	Zeocin
Cisbio Tag-lite Buffer (LABMED)	250	required buffer
Total	11847
Price pr. well	2.96175
Perkin Elmer radioligand binding assays
Item	Price
Milipore MZFBN0W10 X2	900	Plates
Norepinephrine, Levo-[7-3H] - NET377250UC	1906	Radioligand
Iodo-Melatonin, 2-[125I] - NEX236050UC	1570	Radioligand
5-Hydroxytryptamine Creatinine Sulfate, [1,2-3H(N)] - NET498001MC	1300	Radioligand
Enkephalin (2-D-Alanine-5-D-Leucine), [Tyrosyl-3,5-3H(N)]-, 250µCi (9.25MBq) - NET648250UC	3300	Radioligand
Acetylcholine Iodide, [acetyl-3H], 1mCi (37MBq) - NET113001MC	1940	Radioligand
Perkin elmer Membrane target systems 4400 units (https://www.perkinelmer.com/dk/category/membrane-preparations)	12650	Membrane preps
Total	23566
Price pr. well	5.8915
Perkin Elmer GTPgammaS assay
Item	Price
PerkinElmer CytoStar-T 384-well plates RPNQ0165 X3	3699	Plates
PerkinElmer SPA assay kit RPNQ0210	4265	Assay kit
GTPγS, [35S]- 1250Ci/mmol, 12.5mCi/ml - NEG030H250UC	1680	Radioligand
Perkin elmer Membrane target systems 4000 units (https://www.perkinelmer.com/dk/category/membrane-preparations)	11500	Membrane prep
Total	21144
Price pr. well	5.286
Yeast reporter system (This study)
Item	Price
Plasmids (addgene collection Kit #1000000157)	400	kit for yeast GPCR expression
Yeast background strain ATCC yWS677	630	yeast background strain
Greiner Cellstar Plate (Merck M0562) & Greiner Bio-One Plate (675083 sigma 07-000-096)	705	Plates, culture and assay
Promega N1120 (enough for 12000 assays) + Sigma aldrich C4481-50mL X2	1570	luciferin and lysis reagent
Sigma aldrich G5516-100ML Glycerol	50	for cryostocking
Sigma aldrich Y1876-20G: Sc-trp drop out powder	173	Media component
BD difco DF0335-15-9 (Yeast nitrogen base without amino acid and ammonium sulfate)	270	Media component
Sigma-Aldrich A4418-100G: Ammonium Sulfate	42	Media component
Sigma aldrich U5378-100G: Urea	47	Media component
Sigma-Aldrich C0759-100G: Citric acid	28	Media component
Sigma-aldrich 1065851000: Di-sodium hydrogen phosphate (Na2HPO4)	53	Media component
Sigma-Aldrich 1083421000: Glucose monohydrate	70	Media component
VWR: 10040-460: 0.22 µm vacuum filter (1 used)	10	For media sterilisation
Total	4048
Price pr. well	1.012
