# Supplementary material for: Harnessing Chemical Space Neural Networks to Systematically Annotate GPCR ligands
Source: Research Square preprint supplement (doi:10.21203/rs.3.rs-4287546/v1), 2024-06-13
Supplement: Supplementary file 3 [file a9413715619d7b912098a400.docx]

Supplementary Materials for

**Harnessing Chemical Space Neural Networks to**

**Systematically Annotate GPCR ligands**

Frederik G. Hansson1†, Niklas G. Madsen1†, Lea G. Hansen2, Tadas Jakočiūnas1, Bettina Lengger1, Jay D. Keasling3,4,5,6, Michael K. Jensen1,2, Carlos G. Acevedo-Rocha1*, Emil D. Jensen1*

**Affiliations:**

1 The Novo Nordisk Foundation Center for Biosustainability, Technical University of Denmark, DK-2800 Kgs. Lyngby, Denmark

2 Biomia ApS

3 Joint BioEnergy Institute, Emeryville, CA, USA

4 Biological Systems and Engineering Division, Lawrence Berkeley National Laboratory, Berkeley, CA, USA

5 Department of Chemical and Biomolecular Engineering, Department of Bioengineering, University of California, Berkeley, CA, USA

6 Center for Synthetic Biochemistry, Institute for Synthetic Biology, Shenzhen Institutes of Advanced Technologies, Shenzhen, China

* Corresponding authors; [emdaje@biosustain.dtu.dk](mailto:emdaje@biosustain.dtu.dk)[cargac@biosustain.dtu.dk](mailto:cargac@biosustain.dtu.dk)

† These authors contributed equally to the study

**The PDF file includes:**

Supplementary Text

Figs. S1 to S10

Tables S1 to S8

References

**Other Supplementary Materials for this manuscript include the following:**

Supplementary files S1 to S5

**Supplementary text**

***Cost-efficient experimental chemical screening against GPCRs***

When screening thousands of interactions, the price pr. well is a deciding factor on the total scope of a project. The calculation of these prices are, however not trivial, as there are many factors determining the total costs, such as salaries and differences in the laboratory requirements for handling mammalian cell lines, radioactive substances, or yeast. We chose to simplify this equation by only accounting for material costs associated with performing a screen of 4000 individual drug-GPCR interactions in vitro for all known methods available to us. Our combined calculations are available in supplementary File S2, and a summary of the available screen types and their associated advantages/disadvantages is available in supplementary table S1. This analysis identified yeast as the cheapest and most reliable option at 1$/well, where the cheapest alternative is Calcium staining assays on mammalian cell lines engineered to express the GPCR, for which we estimated a price of 1.8$/well.

***Identifying receptor independent effects***

By normalising the raw reads of relative luminescence units with receptor-wise Z-score statistics, we were able to set a unified threshold of |Z|>3 (p-value < 0.003) for hit-determination, and the data could then be compared to prior art registered in our annotated dataset (Figure S6B and C). The distribution of hits across chemical space are available in Supplementary Figure S6A.

Across all tested GPCRs, we observed 92% correspondence between prior art, consisting of 474 individual DTIs, which have a description in prior art and have been screened in this study (Supplementary Figure S6B).

381 of the 474 comparable DTIs are labelled with "no effect", and if only partial agonism and agonism is investigated, the correspondence drops to 68%. However, the majority of all discrepancies are caused by a single GPCR, as HTR1A performed exceptionally poorly, missing out on 19 out of 28 expected agonists and partial agonists, likely due to the reduced sensitivity and low dynamic range observed in the DRC (Figure 4B and Supplementary Figure S4). When excluding HTR1A, the total correspondence rises to 89% for agonists and partial agonists, and to 95% including no effect DTIs. These results demonstrate the conservation of GPCR signalling in yeast across a variety of DTIs.

The largest group of discrepancies were entries in ChEMBL and IUPHAR/BPS guide to pharmacology being classified as "no effect", which our screen identified as hits (Figure 4B). Hexachlorophene and chloroxine (known antifungals), also generally dampened the signal to a similar degree across all GPCRs (Except OPRM1 for chloroxine). Finally, bromocriptine displayed a strongly dampening effect on the CHRM3 GPCR only. By re-screening these compounds on the parental yeast strain ScFH237, we discovered that halogenated phenothiazines, low hydrophilic-lipophilic balance steroids, and all compounds carrying a 7-membered ring, dampened the luminescence signal independently from GPCR signalling (Supplementary Figure S7) and were consequently excluded from our downstream analyses.

***Other discrepancies***

We Observed cases where GPCR activation was measured despite prior art suggesting otherwise. For example, chloroxine activated OPRM1 (Z=8.8), and serotonin activated MTNR1A (Z=5.0) (Supplementary figure S6C). Both have previously been classified as having “no effect" on the respective GPCRs (CHEMBL1201862 (*58*), and CHEMBL1130532 (*59*), respectively). These could be explained by the comparatively high dynamic ranges on the yeast platform, which may have allowed it to detect DTIs that other screens might have missed. Chloroxine is known to bind OPRK1 (*60*), so based on phylogeny, it is not surprising that it also binds to OPRM1 as shown in our screen, despite the conflicting information from prior art. Activation of MTNR1A by serotonin has already been shown in other publications relying on yeast platforms (*22*, *41*), however, this information is not deposited on either ChEMBL or the IUPHAR/BPS guide to pharmacology, which is why an older assay, is the only reference on this DTI in the dataset (*59*). This demonstrates how the high dynamic ranges on the yeast platform (Supplementary figure S4) can help catch DTIs, which other screening campaigns have missed.

Finally, there is a total of 5 previously reported DTIs which the yeast based screen did not catch:

1. Nalbuphine on OPRM1
2. Tramadol on OPRM1,
3. Apomorphine on ADRA2A
4. Pilocarpine on CHRM3
5. Bethanechol on CHRM3

Nr. 2 can be explained, as tramadol is a prodrug, which is only active once oxidised by the human CYP2D6, which the yeast does not have, hence no activity is observed. The others are true mismatches, and could indicate a yeast bias on receptor signalling.

In summary, our findings revealed 92% correspondence between prior research in mammalian cells and the yeast platform, underscoring the viability of yeast as a cost-effective substitute for human cell lines (Supplementary Table S4). HTR1A accounted for most discrepancies due to poor signalling in yeast, while other variations stemmed from compounds that reduced the reporter signal irrespective of GPCRs, indicating yeast-specific effects. By excluding GPCR-independent signal-dampening compounds and HTR1A, the quality of the gathered experimental dataset was drastically increased, and the correspondence to prior art was now 98%

***Expanding the basis of CSNN***

We observed that clustering of GPCRs was conserved between MSA-based phylogeny and clustering based on Cramer’s V statistic on the shared DTIs between GPCRs (Supplementary Figures S2, S3). This information indicated that some gaps might be filled by considering the target’s phylogeny in addition to the protein language models (PLMs) target representation. In fact, the clustering of low-dimensional projections from PLMs implicitly captured the GPCR class and endogenous ligand class (See Supplementary Figure S2).

**Supplementary Figures.**


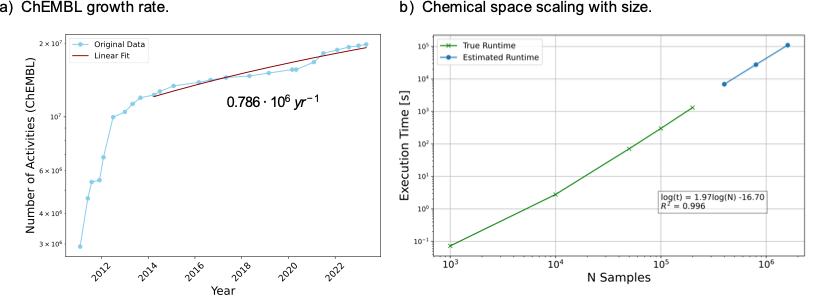


**Figure S1:** (a)) ChEMBL growth rate per year estimated using data from (7), which documents activites for each ChEMBL release. (b) Chemical space network construction computation time, as calculated on a home computer (MacBook, Apple M1 Max, 32 GB RAM). For tens of thousands of compounds, the execution time is on the order of seconds; for hundreds of thousands, it is on the order of minutes. For compound libraries larger than 1 million compounds the runtime was estimated but could not be executed due to lacking memory. Although, looking up the 1-hop neighbourhood for a single compound is extremely fast for a 1.6 million compound library 1.55 ± 0.05 seconds (using randomly samples ZINC smiles strings with precomputed fingerprints). For less than 20K compounds (3.9 seconds), a batch all-vs-all can be computed, which is subquadratic in time. For larger libraries a one-vs-all calculation is performed for all rows.

**Figure S2:** (a) Protein Language model (ESM-2) embedding of GPCR using the ground truth labels from the GDS dataset (*61*), which is comprised of 8354 unique GPCRs. Embedding were dimensionality reduced using t-SNE (*62*). (b) Our unique labeled dataset allows for the identification of correlated GPCRs on the basis of a shared chemical space. For example, ADRA2A and ADRB2 are known to be related phylogenetically by MSA, this is reflected in the populated diagonal, which implies that a compound which is an agonist on one GPCR is likely also on the other. For less correlated GPCRs, the chemical space will be less shared (off-diagonal entries), from which a metric can be derived using Cramer’s V to obtain a correlation between categorical variables. (c) The output of all three methods (i) MSA, (ii) ESM-2 embeddings, and (iii) shared chemical space are a distance matrix from which the phylogenetic trees in supplementary figure S3 are derived.

**Figure S3**: GPCR clustering showing tree structures generated from distances calculated by the ESM-2 Large Language model (ESM-LLM)(*49*), multiple sequence alignment (MUSCLE) (*50*), and from the chemicals they are able/unable to sense. Phylogenetic trees are based on distance matrices (See Figure S2)

**Figure S4**: Dose responses of 7 chosen GPCRs with known agonists. Red dots are individual replicates at each concentration (n=3), blue dots are 0 M negative controls (n=3), not included in the generation of the DRCs. All DRCs are generated using built-in functions in GraphPad Prism 9.5.0. For OPRM1 The EC50 is given as a lower bound, 50% of the maximum observed RLU of this GPCR as we were unable to plateau reporter output at high concentrations. GPCR independent effects were determined using the parent strains (ScFH236 & 237)(Supplementary Figure S5).


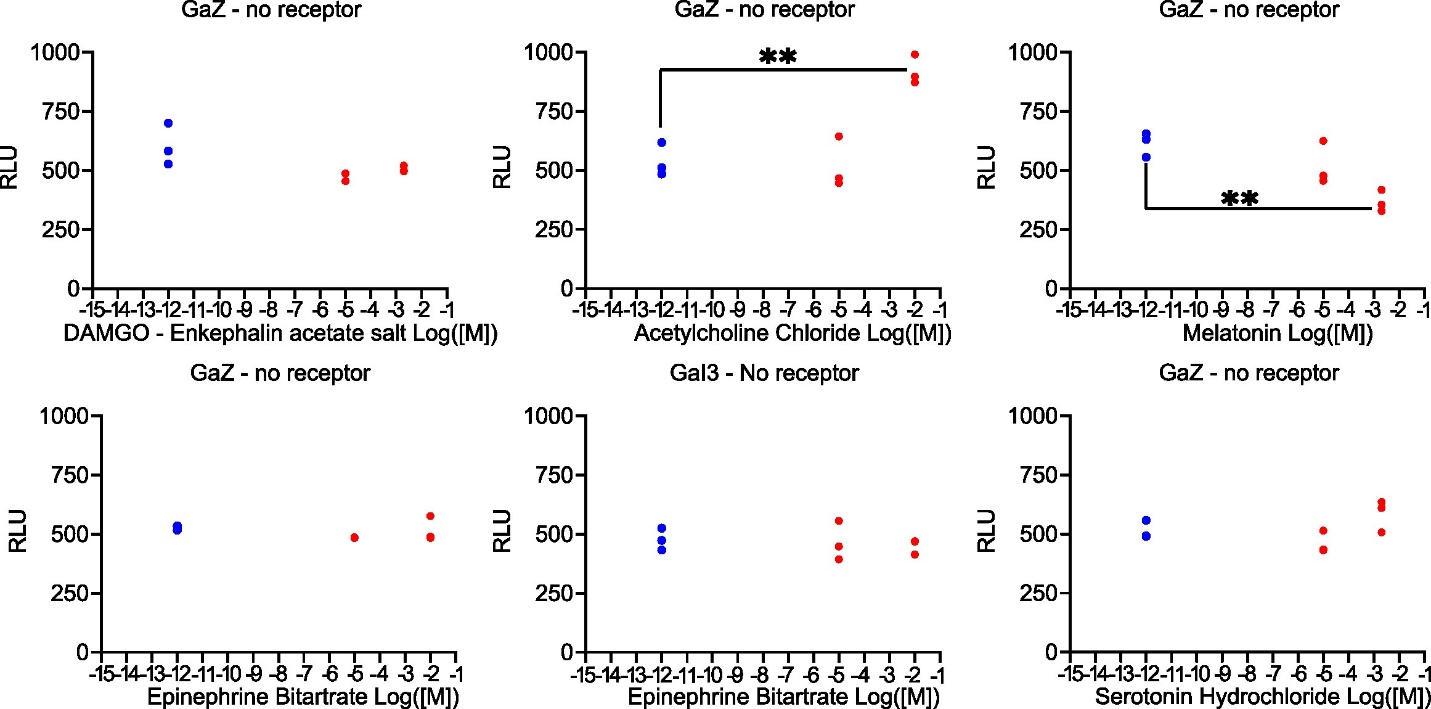


**Figure S5**: No-GPCR controls for Figure 2, Blue dots are 0-concentration controls placed artificially on the logarithmic scaled x-axis. Red dots represent individual datapoints (N=3 at all tested concentrations) of no-GPCR control strains tested against concentrations of the ligands used in Figure 4. GPCR independent effects are observed for acethylcholine chloride at 10 mM and for melatonin at 2 mM (Supplementary figure S5). The early response of acetylcholine chloride against CHRM3 (1E-10 – 1E-5 M) plateaus before the unspecific effect begins, allowing us to determine an EC50 and Hill coefficient for the specific effect on the GPCR. For MTNR1A, the receptor unspecific effect of melatonin indicates that MTNR1A mediated signalling might not have reached a true plateau. **p<0.005


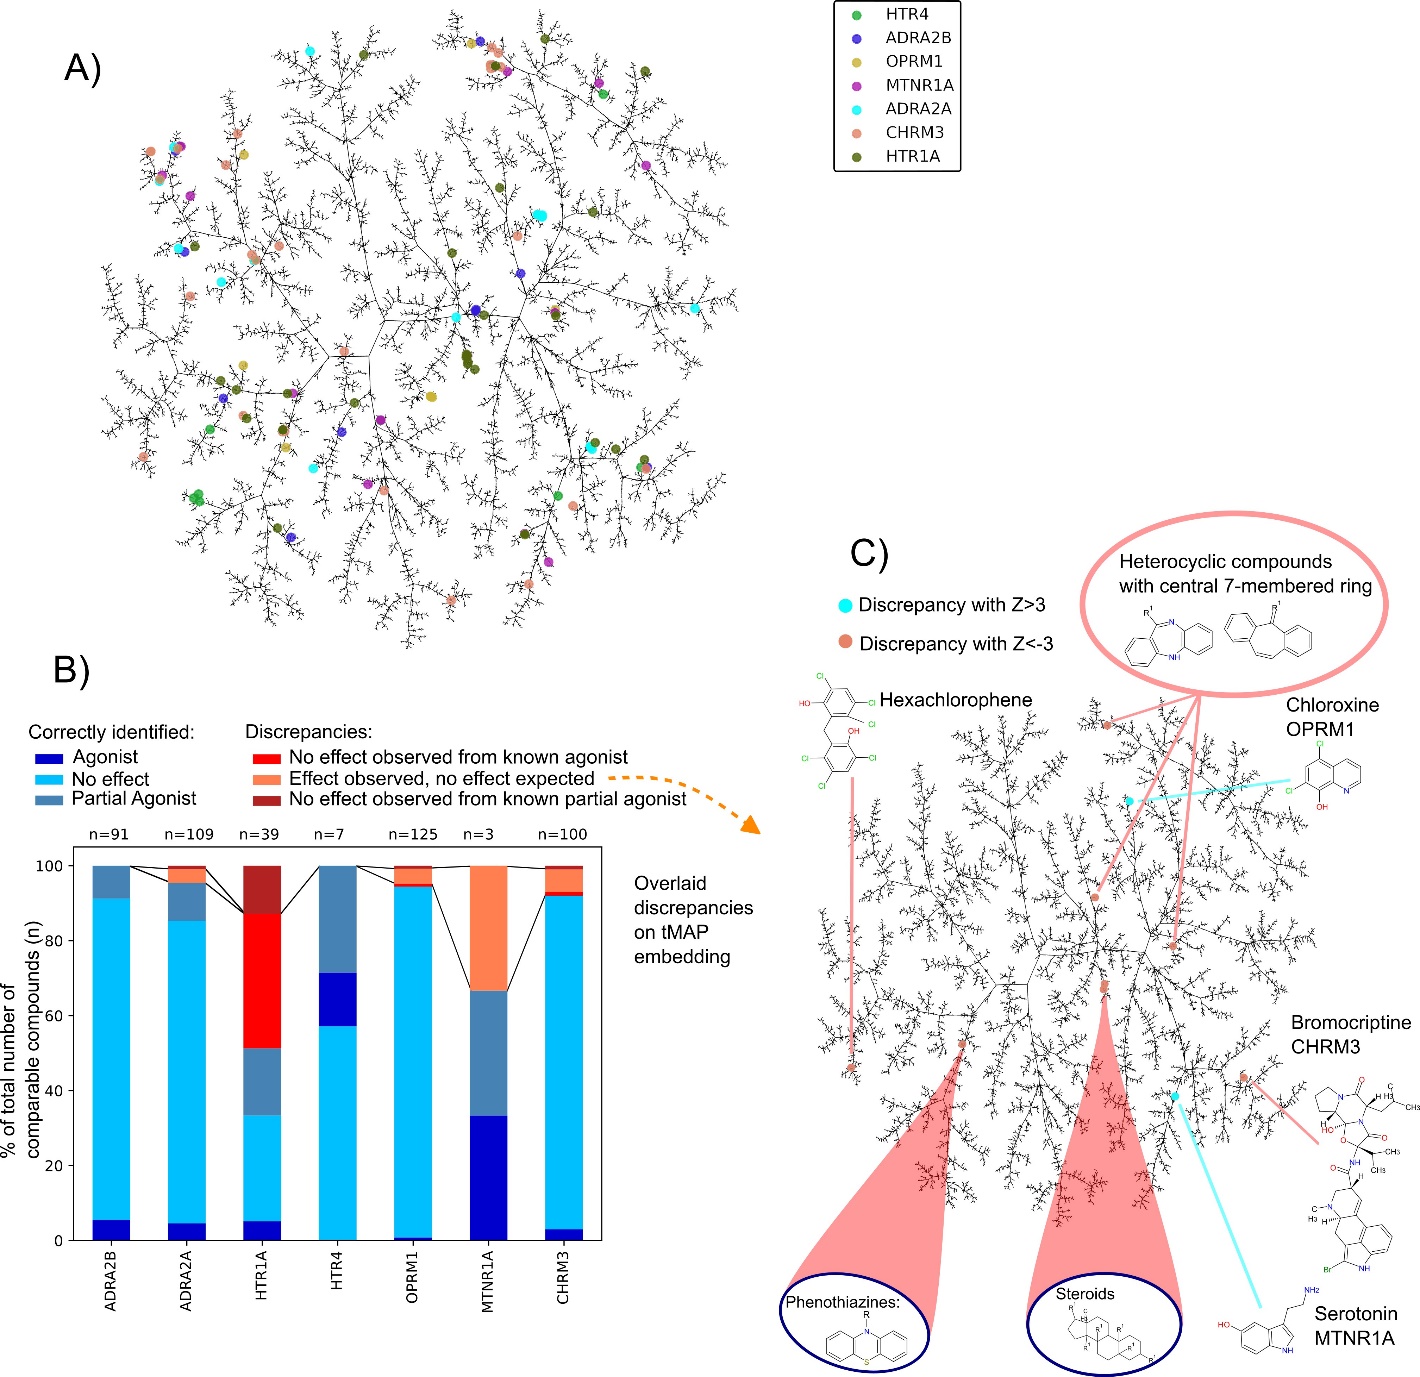


**Figure S6**: tMAP embedding (*14*), generated on the dataset of chemicals targeting one or more of the 128 investigated GPCRs. **A)** The hits obtained from the tested chemical library is highlighted colored by which GPCR the hit was observed on. **B)** hit discrepancies identified by 1:1 comparison with prior art. **C)** Discrepancies, where no effect was expected, but an effect was observed, was overlaid on the tMAP of the chemical space. Some discrepancies clustered together.


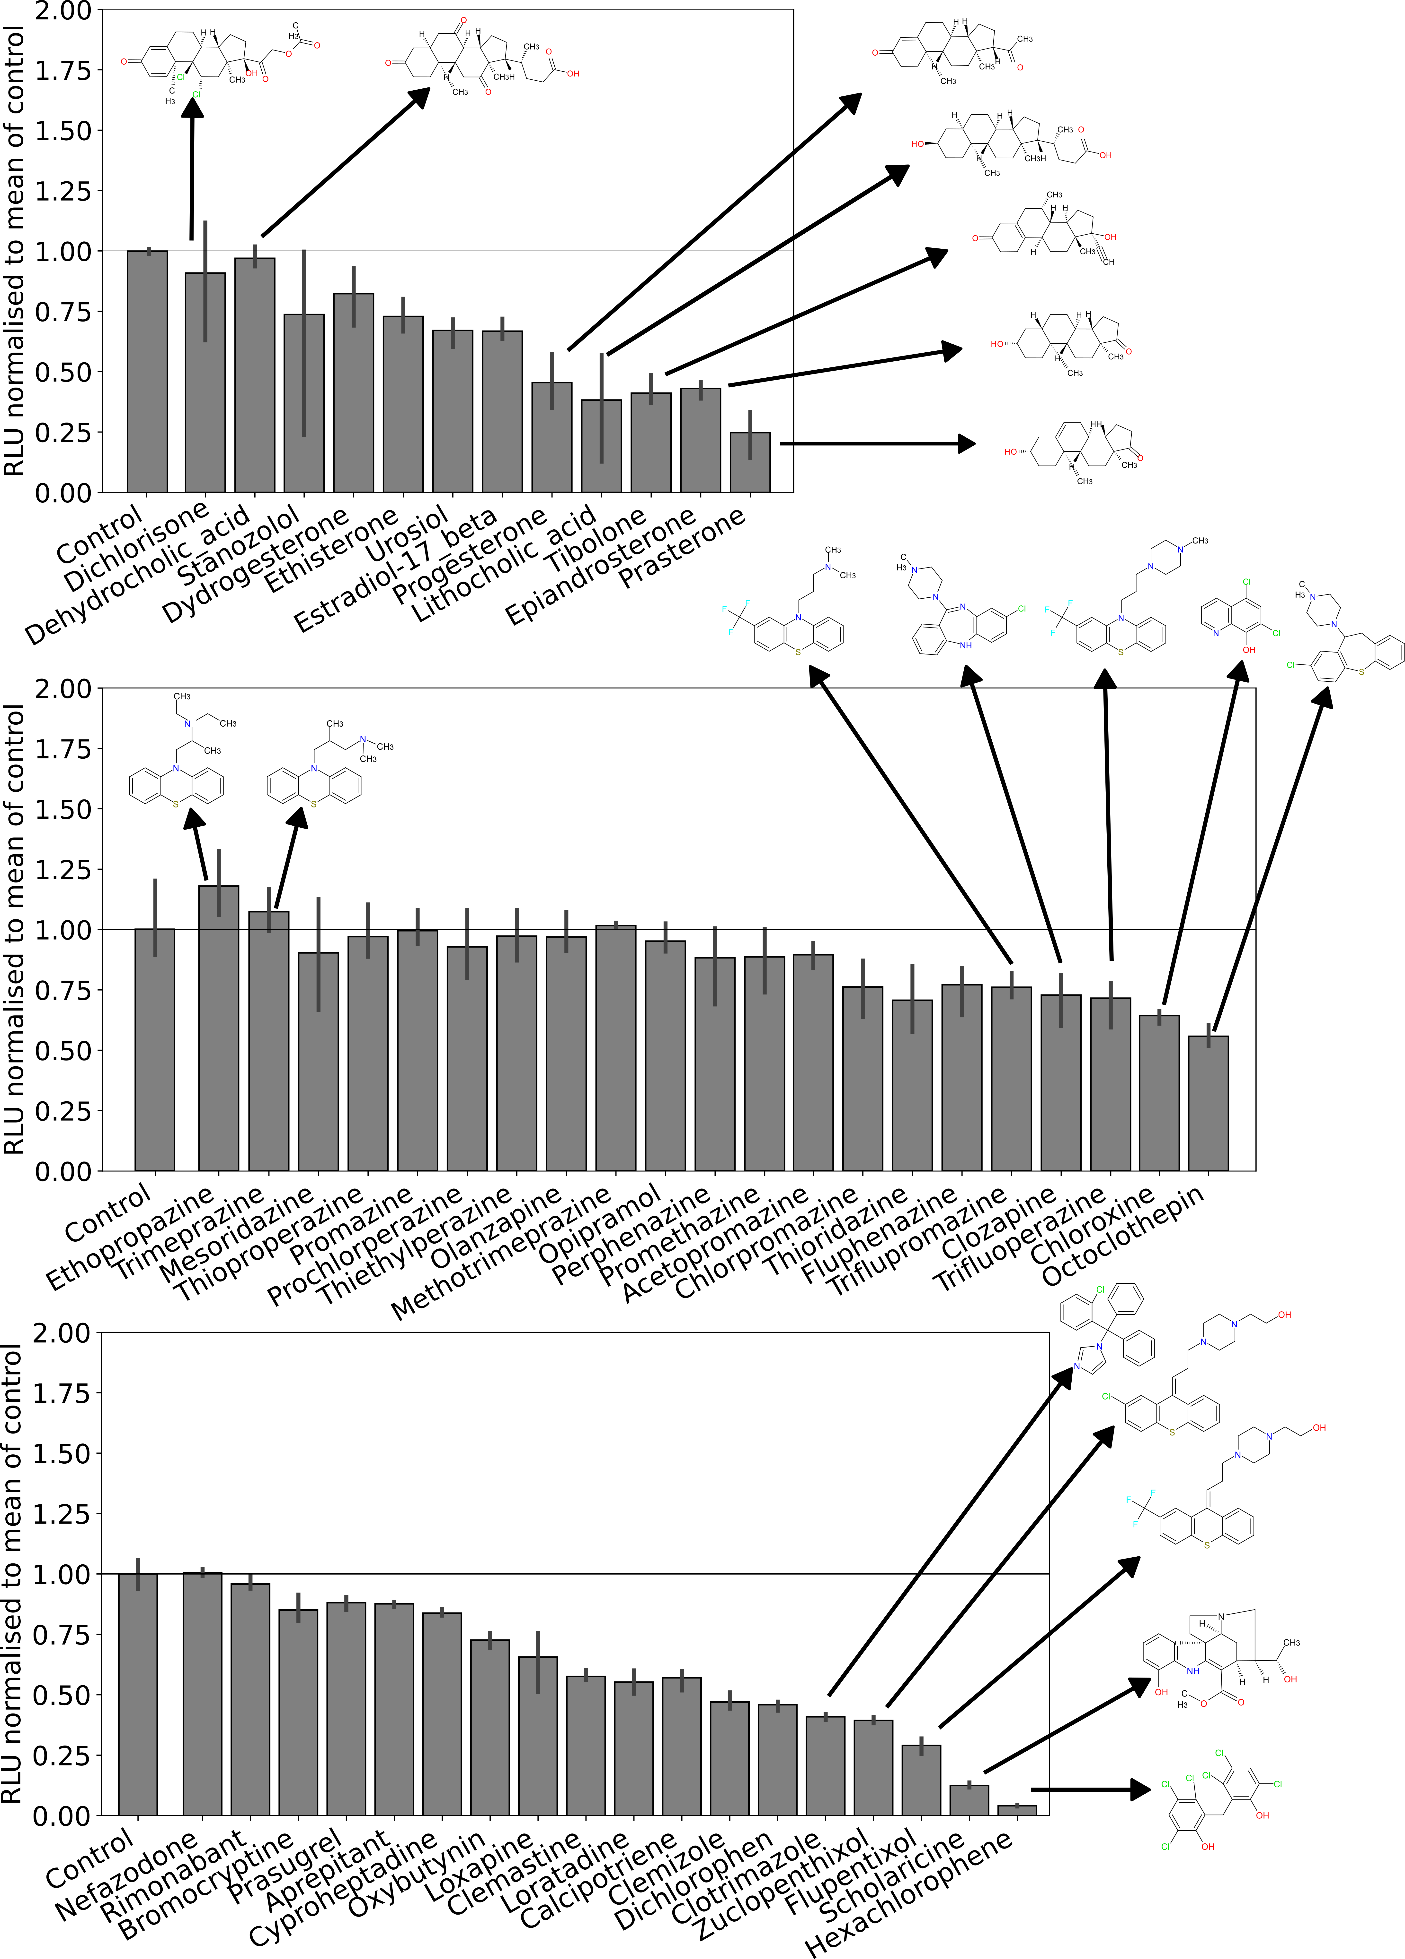


**Figure S7**: GPCR independent effects on yeast, assessed as RLU normalised to the mean RLU of negative controls (1% DMSO) n=3. Top panel contains measurements of steroid class compounds, showing that more oxidised steroids like Dichlorisone and dehydrocholic acid do not affect the signal dampening in the same way as more reduced steroids. Middle panel shows measurements for phenothiazines and similar compounds, illustrating that especially halogenated phenothiazines and 7-membered ring containing compounds dampen the signal. Chloroxine was also included here, as it dampened the signal on non-OPRM1 receptors. Bottom panel contains more tri-cyclic compounds aswell as other compounds selected due to observations of generally dampening effects on luminescence. Compound structures rendered for the 5 most inhibiting compounds in each plot, and for other compounds of interest. Any compound where the standard deviation does not reach the mean of the controls is removed from further analysis due to bias from receptor independent effects. Controls in each plot represent separate triplicates of measurements on RLU upon exposure to 1% DMSO, which is present in all samples. N=3 for all bars.

**Figure S8:** Effect of Modified Z-score on recovering hits, data is shown for each GPCR and the histogram fit is plotted using kernel density estimation to contrast the effect of the Z-score (Eq. 11) against the modified Z-score (Eq. 12).

**Figure S9**: Enhancing interpretability of graph neighbourhoods for a given query by considering only the shortest paths from the query to all other codes. This converts the graph into a tree graph that all expand radially from the query.

**Figure S10**: To avoid a graph structured chemical space an embedding space can be used to efficiently find k-nearest neighbours. We tried using the tMAP (*14*) projection, which we use for visualising chemical space, and which is developed for this chemical use case, but found that molecules which have a high Tanimoto similarity do not necessarily lie close in the embedding space. This makes finding k-NN problematic and as such an all-vs-all pairs similarity search was carried out.

**Table S1:** Overview of current efforts on drug activity inference methods

**Table S1:** Overview of current efforts on drug activity inference methods

| Input | Task | Explanation | Notation | Type | Refs |
| --- | --- | --- | --- | --- | --- |
| *ci* | *yi* | Does the compound have GPCR activity? | *P*(*yi*|*ci*) | Regression, Classification | (*9*, *63*) |
| *ci,tj* | *yi* | Given a compound and its target representation, is the compound active? | *P*(*yi*|*ci,tj*) | Regression, Classification |  |
| *ci,cj* | *yi,yj* | Given two compounds, how active are they? | *P*(*yi,yj*|*ci,cj*) | Regression, Classification | (*35*) |
| *ci* | *tj* | Given a compound, predict its target. | *P*(*ti*|*ci*) | Classification | (*11*) |
| *ci*  Inference from  Neighbourhood | *aj* | Given a compound, predict adverse drug events. | *P*(*ai*|*ci*) | Regression, Classification | (*12*) |
| *ci,tj,Ni*(*yj*) | *yi* | Given a compound, it’s neighbourhood activity on one target *j*, and a target representation *tj*, is it active? | *P*(*yi*|*ci,Ni*(*yj*)*,tj*) | Classification | (ours) |
| *ci,Ni*(*yn*)*,tn* | *yi,n* | Given a compound, it’s neighbourhood activity on all *n* targets, and target representations, on which target is *ci* active? | *P*(*yn,i*|*ci,Ni*(*yn*)*,tj*) | Classification | (ours) |

**Table S2.** Argmax(.) performance metrics across all 128 GPCR. Metrics are shown per bioactivtiy class, and the data illustrates the remarkable predictability of a compound given its neighbourhood.

| Class | Precision | Recall | F1-Score | Support |
| --- | --- | --- | --- | --- |
| Agonist | 0.8966 | 0.9244 | 0.9103 | 62736 |
| No Effect | 0.9271 | 0.8699 | 0.8976 | 73580 |
| Antagonist | 0.8808 | 0.9335 | 0.9064 | 56268 |
| Inverse Agonist | 0.8109 | 0.8721 | 0.8404 | 2720 |
| Allosteric Binding | 0.7737 | 0.6691 | 0.7176 | 1538 |
| Partial Agonist | 0.7029 | 0.5774 | 0.6340 | 4278 |
| Accuracy |  |  | 0.8969 | 201120 |
| Macro Avg | 0.8320 | 0.8077 | 0.8177 | 201120 |
| Weighted Avg | 0.8971 | 0.8969 | 0.8962 | 201120 |

**Table S3.** Mean and standard deviation F1-score metrics for each method across the six bioactivity classes. The metrics are visualised in Figure 3. The standard deviation is calculated across five technical replicates where the respective ML networks were trained.

|  | Performance (Mean ± Std. Dev.) | | | | | |
| --- | --- | --- | --- | --- | --- | --- |
| Method | Agonist | No Effect | Antagonist | Inverse Agonist | Allosteric binding | Partial Agonist |
| MLP | 0.769 ± 0.007 | 0.842 ± 0.003 | 0.848 ± 0.003 | 0.562 ± 0.037 | 0.431 ± 0.040 | 0.716 ± 0.025 |
| RF | 0.760 ± 0.001 | 0.835 ± 0.001 | 0.862 ± 0.001 | 0.463 ± 0.015 | 0.363 ± 0.006 | 0.666 ± 0.003 |
| MLP + N | 0.863 ± 0.009 | 0.908 ± 0.006 | 0.902 ± 0.006 | 0.694 ± 0.047 | 0.602 ± 0.033 | 0.781 ± 0.024 |
| RF + N | 0.847 ± 0.0004 | 0.918 ± 0.0002 | 0.909 ± 0.0005 | 0.632 ± 0.006 | 0.534 ± 0.005 | 0.809 ± 0.004 |
| CSNN | 0.883 ± 0.0009 | 0.915 ± 0.0002 | 0.911 ± 0.0005 | 0.737 ± 0.002 | 0.683 ± 0.009 | 0.869 ± 0.002 |

**Table S4**: a. Prices estimated for the costs of performing an assay similar to the one described in this paper in commercially available GPCR screening systems. b. We used a low volume 96wp format for our small screen of 4000 compounds, converting to 384 wp format as demonstrated by Miettinen et al 2022 (*13*) will reduce the cost of plates by up to 55%, lowering the total cost pr. well to 0.91USD. c. Not all suppliers state their prices outside confidential quotes, this list only contains suppliers with listed prices. Other suppliers include Multispan, Molecular Devices, and Innoprot. d. For the costs of multiplexing, the prices estimated in the respective publications were used, these values reflect the price pr. well, where a single well can assay more than 300 GPCRs. The supporting calculations are available in supplementary file S1. The prices listed are for the operational costs only, excluding instrument acquisition, overhead, and salary. Other sources estimate costs around 10 times higher for mammalian cell based assays (*64*)

| Assay | Advantages | Limitations | Costs: 4000 tests across 7 recep-  tors(USD/well) (a)  (c) |
| --- | --- | --- | --- |
| cAMP | Simple to perform. High sensitivity  Non-lytic methods available for real-time measure-  Ments (*65*) | Gi/o or Gs coupled receptors or chimeric g-proteins only. | PerkinElmer:  Alphascreen - 1.79$  LANCE - 3.21$  Cisbio:  HTRF® - 1.97$  Eurofins:  HitHunter™ - 6.73$ |
| IP1 | More robust alternative to Ca2+ mobilisation assays (*66*) | Gq or Gi coupled receptors or chimeric g-proteins only | Cisbio:  HTRF-IP-One® -  2.84$ |
| Ca2+ mobi-  lization | Cheap compared to most other mammalian cell line based assays. | Rapid and transient signal not suitable for slow binding. Gq or Gi coupled receptors or chimeric g-proteins only (*67*) | Eurofins:  ChemiBrite™ - 1.80$ |
| *β*-arrestin recruitment | Can be used to study biased  signalling  G-protein independent - very applicable to deorphanization High sensitivity, broad dynamic range (Oakley et al., 2002). | Does not determine Gamediated signaling.  Most versions of this assay require receptor editing (*68*). | Eurofins:  PathHunter® -11.7$ ThermoFischer:  Tango™ - 8.58$ |
| Receptor  internalisation | Studies biased signaling G-protein independent - very  applicable to deorphanization (*69*). | Does not determine Ga mediated signaling. | Eurofins:  PathHunter® -11.4$ |
| GTP*γ*[35S]  /Eu binding. | Works with any Ga coupling. Fast and simple protocol (*70*). | Sensitivity lower in HTS format.  May require radioactive substances (*70*). | PerkinElmer - 5.29$ |

**Table S5:** The 7 GPCRs investigated in vitro in this study, and the known treatable conditions for which the respective targets have been used clinically.

| GPCR Target | Known target indications |
| --- | --- |
| HTR1A | Anxiety (*71*)  Depression (*71*)  Pain (*71*)  Schizophrenia (*71*)  Neuroprotection (*71*) |
| HTR4 | Gastro-intestinal disorders (*31*) Anxiety (*72*) |
| CHRM3 | Mucous membrane dryness (*73*)  Blood pressure regulation (*33*)  Alzheimers disease (*32*) Schizophrenia (*32*) |
| OPRM1 | Pain (Paul et al., 2021)  Addiction (Paul et al., 2021) |
| MTNR1A | Sleep–Wake Disorders (*34*) |
| ADRA2A & ADRA2B | Pain (*74*)  Peri-operative ischaemia (*74*)  Blood pressure regulation (*74*) |

**Table S6:** overview of EC50, Hill coefficient and detection limits observed compared to previously reported assays. Lowest EC50’s reported for each GPCR for the same ligand as was used in this study. a. The only reported data in ChEMBL on ADRA2B against epinephrine is from a radioligand competition assay, and as such the value reported is a *Ki* corresponding to competition with [3H]Rauwolscine.

| GPCR | EC50 [M] (This study) | Detection limit [M] (This study) | Hill Coefficient (This study) | Lowest EC50M (Reported in ChEMBL) | Assay type (Reported in ChEMBL) |
| --- | --- | --- | --- | --- | --- |
|
| ADRA2A | 2.10E-06 | 1.00E-08 | 1.8 | 3.0E-08 (*75*) | [35]SGTPγS |
|
| ADRA2B | 6.90E-07 | 1.00E-07 | 2.2 | 4.0E-7 (*15*) | Radioligand competitiona |
|
| HTR4 | 1.60E-06 | 1.00E-10 | 0.29 | 1.2E-08 (*76*) | cAMP |
|
| HTR1A | 1.40E-05 | 1.00E-06 | 1.2 | 5.0E-10 (*77*) | [35]SGTPγS |
|
| CHRM3 | 8.00E-08 | 1.00E-09 | 1.4 | 5.6E-08 (*30*) | cAMP |
|
| MTNR1A | 2.50E-08 | 1.00E-11 | 0.33 | 2.2E-11 (*78*) | cAMP |
|
| OPRM1 | >1.0E-05 | 1.00E-07 | ND | 3.0E-10 (*79*) | cAMP |
|

**Table S7:** Genes used in this study

| Gene name | accesion | Codon optimised? | Sequence |
| --- | --- | --- | --- |
| HTR4 | Q136391 | Yes | ATGGATAAATTGGATGCTAATGTTTCTTCTGAAGAAGGTTTTGGTTCTGTTGAAAAAGTTGTTTTGTTGACTTTTTTGTCTACTGTTATTTTGATGGCTATTTTGGGTAATTTGTTGGTTATGGTTGCTGTTTGTTGGGATAGACAATTGAGAAAAATTAAAACTAATTATTTTATTGTTTCTTTGGCTTTTGCTGATTTGTTGGTTTCTGTTTTGGTTATGCCATTTGGTGCTATTGAATTGGTTCAAGATATTTGGATTTATGGTGAAGTTTTTTGTTTGGTTAGAACTTCTTTGGATGTTTTGTTGACTACTGCTTCTATTTTTCATTTGTGTTGTATTTCTTTGGATAGATATTATGCTATTTGTTGTCAACCATTGGTTTATAGAAATAAAATGACTCCATTGAGAATTGCTTTGATGTTGGGTGGTTGTTGGGTTATTCCAACTTTTATTTCTTTTTTGCCAATTATGCAAGGTTGGAATAATATTGGTATTATTGATTTGATTGAAAAAAGAAAATTTAATCAAAATTCTAATTCTACTTATTGTGTTTTTATGGTTAATAAACCATATGCTATTACTTGTTCTGTTGTTGCTTTTTATATTCCATTTTTGTTGATGGTTTTGGCTTATTATAGAATTTATGTTACTGCTAAAGAACATGCTCATCAAATTCAAATGTTGCAAAGAGCTGGTGCTTCTTCTGAATCTAGACCACAATCTGCTGATCAACATTCTACTCATAGAATGAGAACTGAAACTAAAGCTGCTAAAACTTTGTGTATTATTATGGGTTGTTTTTGTTTGTGTTGGGCTCCATTTTTTGTTACTAATATTGTTGATCCATTTATTGATTATACTGTTCCAGGTCAAGTTTGGACTGCTTTTTTGTGGTTGGGTTATATTAATTCTGGTTTGAATCCATTTTTGTATGCTTTTTTGAATAAATCTTTTAGAAGAGCTTTTTTGATTATTTTGTGTTGTGATGATGAAAGATATAGAAGACCATCTATTTTGGGTCAAACTGTTCCATGTTCTACTACTACTATTAATGGTTCTACTCATGTTTTGAGAGATGCTGTTGAATGTGGTGGTCAATGGGAATCTCAATGTCATCCACCAGCTACTTCTCCATTGGTTGCTGCTCAACCATCTGATACTTGA |

Continued on next page

**Table S7**: (Continued)

| HTR1A | P08908 | Yes | ATGGACGTATTATCACCTGGACAGGGCAACAACACAACAAGTCCCCCTGCACCTTTCGAGACAGGCGGGAACACAACAGGCATCAGTGACGTGACAGTATCATACCAGGTGATCACATCCTTACTACTTGGGACATTAATATTCTGCGCCGTCCTGGGAAACGCATGCGTAGTGGCAGCCATAGCCCTGGAGAGGAGTCTGCAGAACGTCGCAAACTACCTGATCGGCAGCTTAGCCGTAACAGACTTAATGGTCTCAGTGTTAGTGCTTCCGATGGCCGCATTATACCAGGTGCTAAACAAGTGGACGCTGGGACAGGTGACATGCGACCTTTTCATCGCGTTAGACGTCTTATGCTGCACATCATCGATCCTTCACCTTTGCGCAATCGCCCTTGACCGTTACTGGGCCATCACCGACCCCATCGACTACGTGAACAAGAGGACCCCTAGGCGTGCGGCCGCATTAATATCGCTGACCTGGTTAATCGGATTCCTAATATCCATACCGCCTATGTTAGGATGGAGAACCCCGGAAGACCGTAGCGACCCCGACGCCTGCACGATAAGCAAGGACCACGGATACACCATCTACAGTACATTCGGAGCATTCTACATCCCTTTATTACTAATGTTAGTACTTTACGGCCGTATATTCCGTGCCGCAAGGTTCAGGATCCGTAAGACAGTAAAGAAGGTCGAGAAGACCGGAGCAGACACAAGACACGGGGCCAGTCCTGCTCCGCAGCCAAAGAAGAGTGTGAACGGCGAGAGTGGGTCGAGGAATTGGAGACTGGGCGTCGAGTCGAAGGCCGGCGGAGCATTATGTGCTAACGGGGCGGTCAGGCAAGGTGACGACGGCGCAGCGTTAGAGGTAATAGAGGTCCACAGGGTCGGAAACAGCAAGGAGCACTTACCTTTACCTTCTGAGGCCGGACCTACCCCGTGCGCGCCTGCCAGCTTCGAGAGGAAGAACGAGAGGAACGCAGAGGCGAAGCGTAAGATGGCCTTAGCAAGGGAGCGTAAGACAGTGAAGACACTAGGCATCATAATGGGAACCTTCATACTATGCTGGTTACCTTTCTTCATAGTCGCCCTTGTCCTTCCCTTCTGCGAGTCGTCCTGCCACATGCCGACATTACTTGGGGCAATCATCAACTGGCTTGGCTACAGTAACTCCCTTCTAAACCCCGTGATCTACGCCTACTTCAACAAGGACTTCCAGAACGCCTTCAAGAAGATAATCAAGTGCAAGTTCTGCCGTCAGTAG |
| --- | --- | --- | --- |
| ADRA2A | P08913 | Yes | ATGTTCCGGCAGGAGCAGCCACTCGCCGAGGGTTCCTTTGCCCCCATGGGAAGTCTTCAGCCTGACGCCGGCAACGCTAGCTGGAATGGCACCGAAGCGCCCGGTGGAGGGGCTCGGGCTACCCCATATTCTCTCCAGGTCACACTGACCCTGGTTTGTCTGGCCGGTCTCCTGATGCTGCTGACGGTCTTTGGCAATGTTTTGGTGATAATTGCGGTGTTCACCTCCAGAGCACTCAAGGCTCCCCAGAACCTGTTCTTGGTCAGCCTGGCGTCTGCCGATATTCTGGTCGCCACCCTCGTAATTCCGTTTTCTCTTGCCAATGAGGTTATGGGTTACTGGTATTTTGGTAAGGCATGGTGCGAGATATACCTTGCTCTCGACGTTCTCTTCTGCACCAGCAGTATTGTGCATCTGTGCGCAATTAGTCTGGACAGATATTGGTCCATCACGCAGGCAATAGAATATAACTTGAAAAGGACTCCTCGGCGCATTAAGGCTATCATCATCACTGTCTGGGTCATTAGCGCTGTGATAAGCTTCCCTCCACTTATTTCCATTGAAAAAAAAGGAGGAGGCGGAGGGCCGCAGCCTGCGGAGCCCCGCTGTGAGATCAACGATCAGAAATGGTATGTCATCTCCTCCTGCATTGGGTCCTTCTTCGCCCCATGTCTGATTATGATCCTCGTATATGTTAGGATTTATCAGATAGCTAAGCGAAGGACCCGGGTCCCCCCATCCAGGAGAGGTCCAGACGCAGTGGCCGCTCCCCCCGGAGGCACAGAAAGGAGACCTAACGGTCTGGGACCAGAGCGCTCCGCAGGACCTGGAGGTGCAGAAGCCGAGCCCTTGCCGACACAACTGAACGGAGCTCCCGGCGAACCAGCCCCAGCAGGTCCTCGCGATACTGACGCACTGGACCTCGAAGAGTCCTCTAGCAGCGATCATGCAGAGCGCCCTCCAGGGCCTAGGAGACCTGAAAGAGGACCCAGAGGTAAAGGCAAGGCCCGGGCAAGTCAAGTGAAACCGGGAGACTCTCTGCCTCGGAGGGGTCCAGGTGCTACTGGTATAGGGACTCCTGCCGCCGGTCCCGGAGAAGAGCGGGTCGGCGCCGCTAAGGCAAGTCGCTGGCGGGGCAGACAAAACCGGGAAAAAAGGTTTACATTCGTGCTCGCGGTAGTGATTGGCGTCTTCGTCGTGTGCTGGTTTCCATTCTTTTTTACCTATACCCTGACAGCCGTCGGCTGTTCTGTTCCACGGACACTGTTCAAGTTCTTTTTCTGGTTTGGCTACTGTAACTCAAGCCTGAACCCGGTAATCTATACAATATTTAACCACGATTTTCGGAGGGCTTTTAAAAAGATCCTGTGCAGAGGCGATAGGAAACGAATCGTTTAA |
| ADRA2B | P18089 | Yes | ATGGATCATCAGGATCCCTATTCTGTCCAGGCCACTGCGGCCATCGCTGCCGCTATCACTTTTCTCATTCTCTTTACCATCTTCGGGAACGCGCTTGTAATTCTGGCGGTGCTCACCAGCAGGTCACTCAGGGCACCACAAAACCTTTTTCTGGTCTCCCTCGCGGCAGCTGACATTCTCGTCGCAACCCTCATCATTCCCTTTTCACTCGCTAATGAGTTGTTGGGATATTGGTATTTTCGCCGAACCTGGTGCGAGGTGTATCTCGCCCTGGACGTACTGTTTTGCACCTCTTCAATTGTCCATCTTTGTGCAATCAGCCTGGACAGATATTGGGCCGTGTCAAGGGCTCTGGAGTATAATAGCAAGCGGACACCTAGGAGGATCAAGTGCATAATCCTTACAGTCTGGCTCATAGCGGCAGTAATAAGCCTGCCCCCCCTTATATACAAAGGAGATCAGGGCCCTCAACCCAGAGGGCGGCCACAATGCAAGCTGAATCAAGAGGCTTGGTACATTTTGGCGAGCAGCATCGGAAGCTTCTTTGCCCCATGCCTGATCATGATTTTGGTATACCTCAGGATTTACCTGATCGCTAAGCGGTCTAATAGACGCGGGCCTCGGGCTAAGGGAGGACCAGGCCAGGGGGAATCCAAGCAGCCTAGGCCTGATCACGGCGGCGCACTTGCCAGTGCCAAGCTGCCCGCACTGGCCTCCGTCGCGTCAGCAAGAGAAGTCAATGGCCACAGTAAATCTACTGGTGAAAAGGAAGAGGGCGAGACCCCTGAAGATACCGGAACCCGCGCACTGCCTCCAAGTTGGGCTGCGCTGCCAAACTCTGGGCAGGGACAGAAGGAGGGGGTGTGCGGCGCAAGTCCCGAGGACGAGGCCGAGGAGGAGGAAGAAGAAGAGGAGGAAGAGGAGGAATGCGAGCCTCAAGCAGTGCCTGTAAGTCCAGCCTCTGCATGCTCACCTCCTCTTCAGCAGCCACAGGGCTCCAGAGTCCTCGCTACCCTCAGAGGGCAAGTGCTGCTCGGAAGGGGTGTCGGTGCCATTGGAGGGCAATGGTGGCGCCGGCGGGCACAGCTGACCAGAGAAAAGCGCTTCACCTTTGTGCTCGCCGTCGTGATCGGCGTATTCGTTCTCTGCTGGTTCCCATTTTTCTTCTCCTACTCCTTGGGCGCGATTTGTCCTAAGCATTGCAAAGTACCACATGGGCTCTTTCAATTTTTTTTCTGGATTGGTTATTGCAATAGCTCACTGAATCCTGTGATTTACACCATTTTCAATCAGGATTTCCGGCGGGCCTTTAGACGCATTCTGTGCAGGCCGTGGACCCAGACTGCATGGTAA |

Continued on next page

**Table S7**: (Continued)

| CHRM3  ∆il3 | P20309 | Yes | ATGACGCTGCATAATAATTCAACCACAAGCCCTCTGTTCCCTAACATCAGTAGTAGCTGGATACACTCTCCTAGCGACGCCGGACTTCCTCCCGGAACCGTGACCCACTTTGGGTCATATAACGTCTCTCGGGCCGCAGGCAATTTTTCTTCCCCAGATGGGACAACCGACGATCCGCTCGGCGGCCACACTGTATGGCAGGTGGTTTTCATAGCCTTTCTGACCGGCATTCTGGCTCTGGTCACAATCATCGGCAATATTCTGGTAATTGTGTCCTTCAAGGTAAACAAACAACTGAAGACTGTCAATAACTACTTTCTGCTTAGTTTGGCATGCGCCGATCTGATTATCGGAGTGATAAGTATGAATCTCTTCACTACTTACATCATTATGAACAGATGGGCTCTGGGTAACTTGGCTTGCGACCTGTGGCTCGCAATTGACTATGTCGCAAGCAACGCCAGTGTGATGAACCTTCTGGTTATTAGCTTCGACCGCTATTTTAGCATTACACGCCCTCTGACCTACAGAGCGAAACGCACTACAAAGCGGGCAGGAGTTATGATCGGCCTGGCCTGGGTCATTTCCTTCGTGCTCTGGGCACCAGCCATCTTGTTCTGGCAGTATTTCGTCGGTAAGAGGACAGTCCCACCAGGCGAGTGCTTCATCCAATTTTTGTCCGAGCCAACCATAACATTCGGCACAGCCATCGCGGCATTTTACATGCCAGTGACTATCATGACCATTCTGTACTGGAGAATCTACAAAGAAACCGAAAAGCGGACAAAGGAGTTGGCAGGGCTTCAGGCATCAGGCACAGAGACCCGGTCACAGATAACCAAGCGCAAGCGAATGTCACTCGTGAAAGAAAAAAAAGCAGCACAGACATTGAGCGCCATCTTGCTCGCTTTTATCATAACATGGACACCCTACAATATCATGGTCCTCGTGAACACTTTCTGCGACTCCTGTATTCCTAAGACTTTCTGGAACCTCGGCTACTGGCTGTGCTATATCAACAGTACAGTTAACCCTGTGTGCTACGCTCTCTGTAACAAGACCTTTAGGACCACGTTCAAGATGCTCCTCCTGTGCCAGTGTGACAAAAAGAAACGACGAAAGCAGCAATATCAGCAGCGACAGAGTGTGATCTTTCATAAACGGGCGCCAGAACAAGCGCTCTAA |
| --- | --- | --- | --- |
| OPRM1 | P353721 | No | ATGGACAGCAGCGCTGCCCCCACGAACGCCAGCAATTGCACTGATGCCTTGGCGTACTCAAGTTGCTCCCCAGCACCCAGCCCCGGTTCCTGGGTCAACTTGTCCCACTTAGATGGCAACCTGTCCGACCCATGCGGTCCGAACCGCACCGACCTGGGCGGGAGAGACAGCCTGTGCCCTCCGACCGGCAGTCCCTCCATGATCACGGCCATCACGATCATGGCCCTCTACTCCATCGTGTGCGTGGTGGGGCTCTTCGGAAACTTCCTGGTCATGTATGTGATTGTCAGATACACCAAGATGAAGACTGCCACCAACATCTACATTTTCAACCTTGCTCTGGCAGATGCCTTAGCCACCAGTACCCTGCCCTTCCAGAGTGTGAATTACCTAATGGGAACATGGCCATTTGGAACCATCCTTTGCAAGATAGTGATCTCCATAGATTACTATAACATGTTCACCAGCATATTCACCCTCTGCACCATGAGTGTTGATCGATACATTGCAGTCTGCCACCCTGTCAAGGCCTTAGATTTCCGTACTCCCCGAAATGCCAAAATTATCAATGTCTGCAACTGGATTCTCTCTTCAGCCATTGGTCTTCCTGTAATGTTCATGGCTACAACAAAATACAGGCAAGGTTCCATAGATTGTACACTAACATTCTCTCATCCAACCTGGTACTGGGAAAACCTGCTGAAGATCTGTGTTTTCATCTTCGCCTTCATTATGCCAGTGCTCATCATTACCGTGTGCTATGGACTGATGATCTTGCGCCTCAAGAGTGTCCGCATGCTCTCTGGCTCCAAAGAAAAGGACAGGAATCTTCGAAGGATCACCAGGATGGTGCTGGTGGTGGTGGCTGTGTTCATCGTCTGCTGGACTCCCATTCACATTTACGTCATCATTAAAGCCTTGGTTACAATCCCAGAAACTACGTTCCAGACTGTTTCTTGGCACTTCTGCATTGCTCTAGGTTACACAAACAGCTGCCTCAACCCAGTCCTTTATGCATTTCTGGATGAAAACTTCAAACGATGCTTCAGAGAGTTCTGTATCCCAACCTCTTCCAACATTGAGCAACAAAACTCCACTCGAATTCGTCAGAACACTAGAGACCACCCCTCCACGGCCAATACAGTGGATAGAACTAATCATCAGCTAGAAAATCTGGAAGCAGAAACTGCTCCGTTGCCCTAA |
| MTNR1A | P48039 | Yes | ATGCAAGGTAATGGTTCTGCTTTGCCAAATGCTTCTCAACCAGTTTTGAGAGGTGATGGTGCTAGACCTTCTTGGTTGGCTTCTGCTTTAGCTTGTGTTTTGATTTTCACCATCGTTGTCGATATCTTGGGTAACTTGTTGGTTATCTTGTCCGTCTACCGTAACAAGAAATTGAGAAACGCTGGTAACATCTTCGTTGTTTCTTTGGCTGTTGCTGATTTGGTTGTTGCTATCTATCCATATCCACTGGTCTTGATGTCCATTTTTAACAACGGTTGGAACTTGGGTTACTTGCATTGTCAAGTTTCTGGTTTCTTGATGGGTTTGTCCGTTATTGGTTCCATTTTCAACATTACCGGTATCGCCATTAACAGGTACTGTTACATTTGCCACTCACTGAAGTACGACAAGTTGTACTCTTCTAAGAACTCCTTGTGCTACGTTTTGTTGATCTGGTTGTTAACTTTGGCTGCTGTTTTGCCTAATTTGAGAGCTGGTACATTGCAATACGATCCAAGAATCTACTCTTGTACCTTCGCTCAATCTGTTTCTTCTGCTTACACTATTGCCGTTGTCGTTTTCCATTTTTTGGTCCCAATGATTATCGTCATCTTCTGCTACTTGAGAATCTGGATTTTGGTCTTGCAAGTCAGACAAAGAGTTAAGCCAGATAGAAAGCCAAAATTGAAGCCACAAGACTTCAGAAACTTCGTTACCATGTTTGTGGTTTTCGTTTTGTTCGCTATTTGTTGGGCTCCATTGAACTTTATTGGTTTGGCAGTTGCTTCTGATCCAGCTTCTATGGTTCCAAGAATTCCAGAATGGTTGTTCGTTGCTTCTTACTACATGGCTTACTTCAACTCTTGTTTGAACGCCATTATCTACGGCTTGTTGAATCAGAACTTTAGGAAAGAGTACAGGCGTATCATCGTTTCTTTGTGTACTGCTAGAGTTTTCTTCGTCGATTCCTCTAATGATGTTGCCGATAGAGTTAAGTGGAAACCATCTCCATTGATGACCAACAACAATGTTGTCAAGGTTGACTCCGTTGGATCCTGA |
| NanoLuc | (*29*) | No | ATGGTCTTCACACTCGAAGATTTCGTTGGGGACTGGCGACAGACAGCCGGCTACAACCTGGACCAAGTCCTTGAACAGGGAGGTGTGTCCAGTTTGTTTCAGAATCTCGGGGTGTCCGTAACTCCGATCCAAAGGATTGTCCTGAGCGGTGAAAATGGGCTGAAGATCGACATCCATGTCATCATCCCGTATGAAGGTCTGAGCGGCGACCAAATGGGCCAGATCGAAAAAATTTTTAAGGTGGTGTACCCTGTGGATGATCATCACTTTAAGGTGATCCTGCACTATGGCACACTGGTAATCGACGGGGTTACGCCGAACATGATCGACTATTTCGGACGGCCGTATGAAGGCATCGCCGTGTTCGACGGCAAAAAGATCACTGTAACAGGGACCCTGTGGAACGGCAACAAAATTATCGACGAGCGCCTGATCAACCCCGACGGCTCCCTGCTGTTCCGAGTAACCATCAACGGAGTGACCGGCTGGCGGCTGTGCGAACGCATTCTGGCGTAA |

**Table S8**: Yeast strains generated in this study

| ScFH236 | BY4741-MATa,sst2∆0,far1∆0,bar1∆0,ste2∆0,ste12∆0,gpa1∆0, ste3∆0,mf(alpha)1∆0,mf(alpha)2∆0,mfa1∆0,mfa2∆0,gpr1∆0,gp a2∆0,LexO(6x)-pLEU2m-NanoLuc-tTDH1-pCCW12-STE2-tSSA  1-pPGK1-GPA1-YIGLC-tENO2-pRAD27-LexA-PRD-tENO1-UR A3 | This study |
| --- | --- | --- |
| ScFH237 | BY4741-MATa,sst2∆0,far1∆0,bar1∆0,ste2∆0,ste12∆0,gpa1∆0, ste3∆0,mf(alpha)1∆0,mf(alpha)2∆0,mfa1∆0,mfa2∆0,gpr1∆0,gp a2∆0,LexO(6x)-pLEU2m-NanoLuc-tTDH1-pCCW12-STE2-tSSA  1-pPGK1-GPA1-YIGLC-tENO2-pRAD27-LexA-PRD-tENO1-UR A3 | This study |
| ScS1 | ScFH237 + PCCW12-HsHTR1A-TCYC1 | This study |
| ScS2 | ScFH237 + PCCW12-HsHTR4-TCYC1 | This study |
| ScS3 | ScFH237 + PCCW12-HsADRA2A-TCYC1 | This study |
| ScS4 | ScFH236 + PCCW12-HsADRA2B-TCYC1 | This study |
| ScS5 | ScFH237 + PCCW12-OPRM1-TCYC1 | This study |
| ScS6 | ScFH237 + PCCW12-HsCHRM3-TCYC1 | This study |
| ScS7 | ScFH237 + PCCW12-HsMTNR1A-TCYC1 | This study |
